# Supplementary material
Source: publisher figshare collection journal article supplement (https://gsajournals.figshare.com/ndownloader/files/18042926)
Supplement: Supplementary file 1 [file 18042926]

Accession numbers for available data/sequences:

*Leptopilina heterotoma* genome assembly: BioProject PRJNA486159

Male genome: QYUB0000000

Female genome: QYUC0000000

Joint genome: VOOK00000000

*Leptopilina heterotoma* strain *Lh* 14, whole-body transcriptome: GHUQ00000000

*Leptopilina heterotoma* abdominal transcriptome by Goecks et al.: BioProject PRJNA202370, Accession number GAJC0000000

*Leptopilina heterotoma* strain Lh14 proteome: PRIDE: PXD005632
